# Supplementary material for: Urchin-like CoO–C micro/nano hierarchical structures as high performance anode materials for Li-ion batteries
Source: Royal Society of Chemistry journal article supplement (doi:10.1039/c6ra26937k), 2017-01-01
Supplement: c6ra26937k1.pdf [file c6ra26937k1.pdf]

## Electronic Supplementary Information

### **Urchin-like CoO-C Micro/Nano Hierarchical Structures as High Performance Anode Materials for Li-Ion Batteries**

*Lili Liu, Lihui Mou, Jia Yu, Shimou Chen\**

## Supplementary Figures

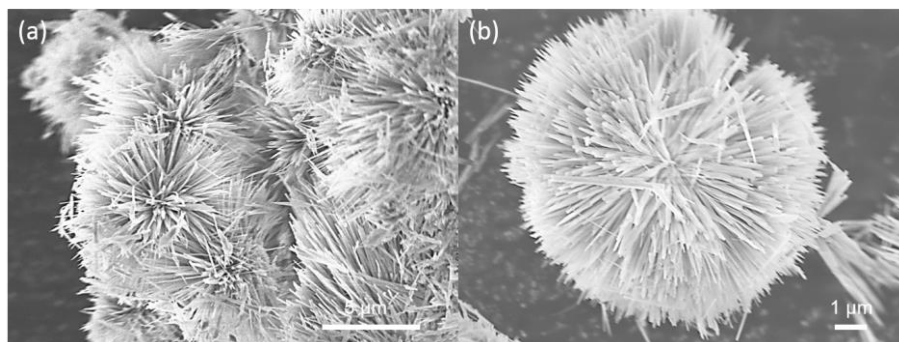

**Fig. S1** Morphologies of urchin-like cobalt carbonate hydroxide precursor microspheres.

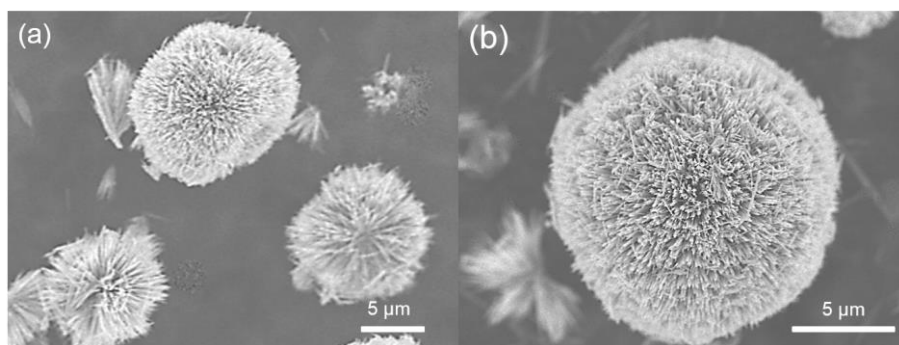

**Fig. S2** Morphologies of final CoO-C microspheres.

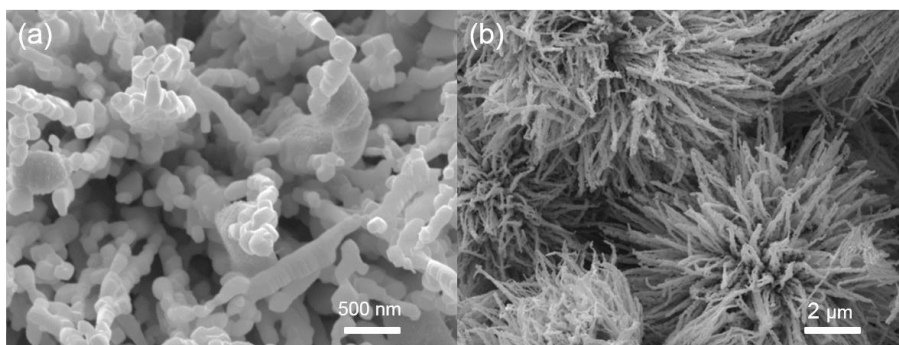

**Fig. S3** Morphologies of CoO-C microspheres with higher carbon coating amount.

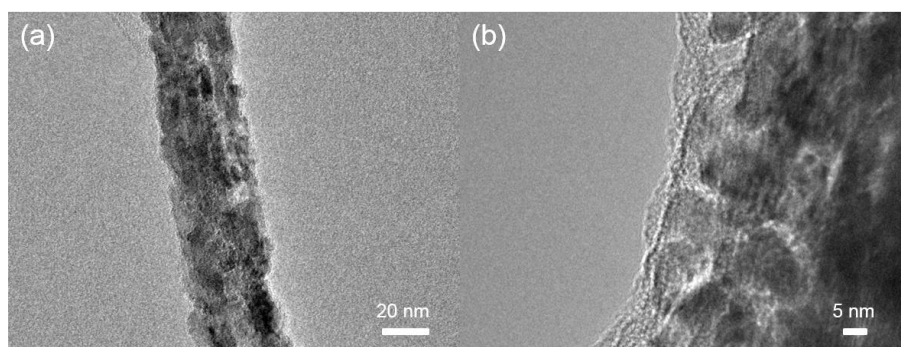

**Fig. S4** TEM image of the individual nanowire, exhibiting the porous structure of inner CoO and the thin carbon coating layer.

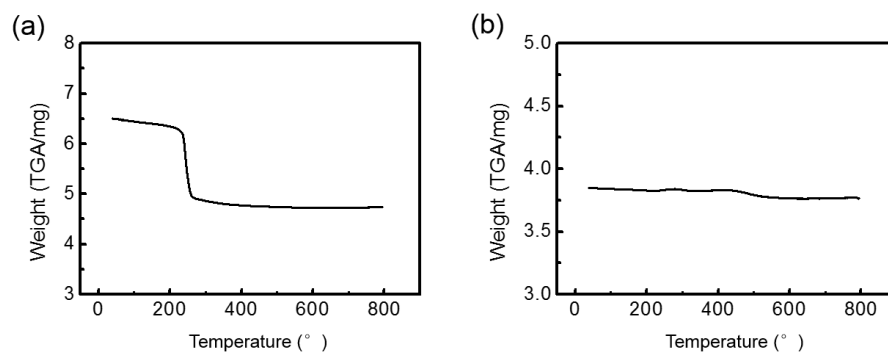

**Fig. S5** TG analysis curve of the (a) cobalt carbonate hydroxide precursor and (b) CoO-C final product.

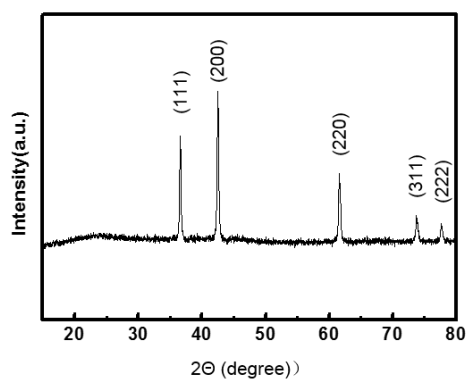

**Fig. S6** XRD pattern of the single CoO material without carbon coating layer.

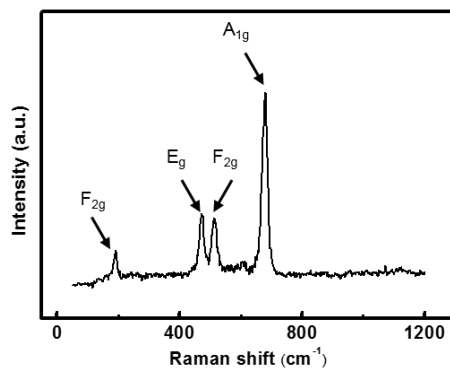

**Fig. S7** Raman spectrum, exhibiting the F<sub>2g</sub>, A<sub>1g</sub> and E<sub>g</sub> peaks of CoO.



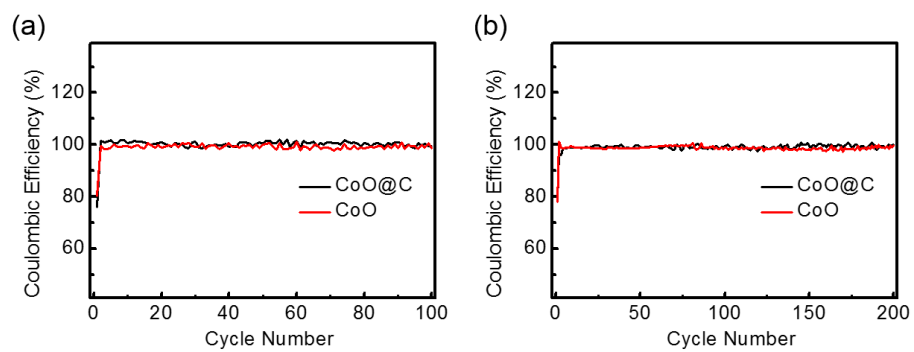

**Fig. S8** Coulombic efficiencies of the CoO-C and CoO during cycles with current densities of (a)  $100 \text{ mA g}^{-1}$  and (b)  $500 \text{ mA g}^{-1}$ .

**Table S1** Performance comparison with other LIB anodes based on cobalt-oxide based multiple or single component nanostructures.

| Electrode material                                                             | Cycle Numbers | Discharge Capacity/mAhg <sup>-1</sup> | Current density/mAg <sup>-1</sup> | Ref                                                         |
|--------------------------------------------------------------------------------|---------------|---------------------------------------|-----------------------------------|-------------------------------------------------------------|
| Urchin-like CoO@C Microspheres                                                 | 100           | 755                                   | 100                               | Our Work                                                    |
| Mesoporous Co <sub>3</sub> O <sub>4</sub> Nanowire Arrays                      | 20            | 700                                   | 111                               | <i>Nano Lett.</i> , 2008, <b>8</b> , 265                    |
| Co <sub>3</sub> O <sub>4</sub> Nanobelt Array                                  | 25            | 770                                   | 177                               | <i>ACS Nano</i> , 2010, <b>4</b> , 1425                     |
| Single-, Double-, Triple-Shelled Co <sub>3</sub> O <sub>4</sub> hollow spheres | 50            | 680, 866, 611                         | 178                               | <i>Adv. Funct. Mater.</i> , 2010, <b>20</b> , 1680          |
| Mesoporous Co <sub>3</sub> O <sub>4</sub> Nanowire Arrays                      | 70            | 550                                   | 100                               | <i>Adv. Funct. Mater.</i> , 2012, <b>22</b> , 861           |
| Porous ZnCo <sub>2</sub> O <sub>4</sub> Nanoflakes                             | 25            | 750                                   | 80                                | <i>J. Mater. Chem.</i> , 2010, <b>20</b> , 4439             |
| CoO@N-Doped Carbon Nanocube                                                    | 50            | 598.3                                 | 100                               | <i>ACS Appl. Mater. Interfaces</i> , 2014, <b>6</b> , 10602 |
| CoO@C wall arrays                                                              | 60            | 804                                   | 500                               | <i>J. Mater. Chem. A</i> , 2014, <b>2</b> , 11597           |
